# Supplementary material
Source: PubMed Central journal article supplement (PMC2918943)

Table S1: Genotype of strains and plasmids used in this study.

| Gene    |              |           |                                                     | Strain |        |        | Plasmid |         |         |
|---------|--------------|-----------|-----------------------------------------------------|--------|--------|--------|---------|---------|---------|
| DVU no. | name         | Size (nt) | Predicted function                                  | DvH    | JW9021 | JW9063 | pMO9116 | pMO9117 | pMO9118 |
| DVU0846 | <i>apsB</i>  | 504       | adenylylsulphate reductase beta subunit             | +      | +      | +      | -       | -       | -       |
| DVU0847 | <i>apsA</i>  | 1995      | adenylylsulphate reductase alpha subunit            | +      | +      | +      | -       | -       | -       |
| DVU0848 | <i>qmoA</i>  | 1239      | Quinone-interacting membrane-bound oxidoreductase A | +      | -      | +      | +       | +       | -       |
| DVU0849 | <i>qmoB</i>  | 2277      | Quinone-interacting membrane-bound oxidoreductase B | +      | -      | +      | +       | +       | -       |
| DVU0850 | <i>qmoC</i>  | 1155      | Quinone-interacting membrane-bound oxidoreductase C | +      | -      | +      | +       | +       | -       |
| DVU0851 | hypothetical | 747       | Hypothetical                                        | +      | -      | -      | -       | +       | +       |

Table S2: Primers used for PCR amplification, Southern/Northern probe generation, and sequencing.

| Primer name        | Primer sequence                                                                                        | Application                                                                                                                                                         |
|--------------------|--------------------------------------------------------------------------------------------------------|---------------------------------------------------------------------------------------------------------------------------------------------------------------------|
| DVU0848-51-1       | TCAGGCCAACCTCTGGGC                                                                                     | For deletion of <i>qmoABC</i> -DVU0851, upstream of DVU0848, forward                                                                                                |
| DVU0848-51-2       | AAGACTGTAGCCGTACCTCGAATCTA <sup>a'</sup><br>CCTTGGTATCCTCCCTACGTGTTTTGG                                | Complement of common sequence-1 and for deletion of <i>qmoABC</i> -DVU0851, upstream of DVU0848, reverse                                                            |
| DVU0848-51-3       | AATCCGCTCACTAAGTTCATAGACCG <sup>c</sup><br>TCGCCCCCGTCTTCATGC                                          | Common sequence -2 and downstream of DVU0851 forward, for pMO9020 and pMO9062                                                                                       |
| DVU0848-51-4b      | GTAGCTTGCGCGAATCTGCTTCA                                                                                | For deletion of <i>qmoABC</i> -DUV0851, downstream of DVU0851, reverse, for pMO9020 and pMO9062                                                                     |
| bc0059f            | TAGATTCGAGGTACGGCTACAGTCTT <sup>a</sup><br>CTCTTTCTAAGTGAGTCGAG <sup>b</sup> CCCAGAGTCCCGCTCAG         | Common sequence-1, barcode sequence-1, and for amplification of Kan <sup>r</sup> for pMO9020, forward                                                               |
| bc0059r            | CGGTCTATGAACCTAGTGAGCGGATT <sup>c'</sup><br>CACCTGAGAAGACGTAGTAC <sup>d'</sup><br>GAGGTAGCTTGCAGTGGGCT | Complement of common-sequence-1, complement of barcode sequence-2, and for amplification of Kan <sup>r</sup> for pMO9020, reverse                                   |
| RDVU0850-281F      | CACTTCGCAACATGGCCTACCAG                                                                                | For sequencing of complementing plasmids pMO9040 and pMO9042 and amplification of Southern probe for confirmation of JW9063, forward                                |
| DVU0851-2          | AAGACTGTAGCCGTACCTCGAATCTA <sup>a'</sup><br>TTCGGCCTCCTGATTCTCTTTCCGG                                  | Complement of common sequence-1 and for deletion of DVU0851, upstream of DVU0851, and amplification of Southern probe for confirmation of JW9063, reverse           |
| bc0082f            | TAGATTCGAGGTACGGCTACAGTCTT <sup>a</sup><br>GTGTCGACTCCGACGGTAT <sup>e</sup> CCCAGAGTCCCGCTCAG          | Common sequence-1, barcode sequence-1, and for amplification of Kan <sup>r</sup> for pMO9062, forward                                                               |
| bc0082r            | CGGTCTATGAACCTAGTGAGCGGATT <sup>c'</sup><br>GCGTTAATGTGAGCTACGA <sup>f</sup><br>GAGGTAGCTTGCAGTGGGCT   | Complement of common sequence-1, complement of barcode sequence-2, and for amplification of Kan <sup>r</sup> for pMO9062, reverse                                   |
| TOPO8-F            | AACGACGGCCAGTCTTAAGC                                                                                   | For colony PCR screen and sequencing of deletion cassettes pMO9020 and pMO9062, forward                                                                             |
| TOPO8-R            | AGACACGGGCCAGAGCTG                                                                                     | For colony PCR screen and sequencing of deletion cassettes pMO9020 and pMO9062 (reverse); for sequencing of complementing plasmid pMO9074 (forward)                 |
| DVU0847-4F         | TGGCGTGGGTACCTACTACACC                                                                                 | For sequencing of deletion cassette pMO9020 and amplification of <i>apsA</i> from cDNA, forward                                                                     |
| DVU0847-4R         | GGTGTAGTAGGTACCCACGCCA                                                                                 | For sequencing of deletion cassette pMO9020, amplification of Southern probe for confirmation of JW9021, and to obtain Northern blot probe of <i>apsA</i> , reverse |
| DVU0848-2F         | TGAGACCAGCCTTGACTAC                                                                                    | For sequencing of deletion cassettes pMO9020 and pMO9062, forward                                                                                                   |
| DVU0848-2R         | GTAGTCCAAGGCTGGTGTCTCA                                                                                 | For sequencing of deletion cassette pMO9020 and amplification of <i>qmoABC</i> -DVU0851 for pMO9040, reverse                                                        |
| Km_int_Fwd_revcomp | CTCATCCTGTCTCTTGATCAGATCT                                                                              | For sequencing of deletion cassettes pMO9020 and pMO9063, forward                                                                                                   |
| Km_int_Rev_revcomp | CTACCCGTGATATTGCTGAAGAG                                                                                | For sequencing of deletion cassettes pMO9020 and pMO9063, reverse                                                                                                   |
| KO0851-1F          | CATCAGGACGCAAACCGAGAATGC                                                                               | For sequencing of deletion cassette pMO9062, forward                                                                                                                |
| KO0851-2R          | TTCGCCAAGCCGATCATGGC                                                                                   | For sequencing of deletion cassette pMO9062, reverse                                                                                                                |

|                    |                                                                                  |                                                                                                                    |
|--------------------|----------------------------------------------------------------------------------|--------------------------------------------------------------------------------------------------------------------|
| qmoA-SLIC-RBS-F    | AGGTTGGGAAGCCCTGCAA<br>TGCAGTCCCAGGAGGTACCAT<br>ATGTCGAACTCCATACTCGTCGTCG        | Cloning RBS <sup>S</sup> into pMO9040 and pMO9042                                                                  |
| DVU0851-SLIC-RBS-F | AGGTTGGGAAGCCCTGCAA<br>TGCAGTCCCAGGAGGTACCAT<br>ATGTCTGACGAAGGTCGTAGAATGTTCAA    | Cloning RBS into pMO9074                                                                                           |
| pMO9075-SLIC-R2    | TTGCAGGGCTTCCCAACCT                                                              | Cloning RBS into pMO9040, pMO9042, and pMO9074                                                                     |
| DVU0850-1155R      | CTAACGACGACCCATTGCGCG                                                            | For sequencing of deletion cassette pMO9062 and sequencing of complementing plasmids pMO9116 and pMO9117, reverse  |
| DVU0847-3F         | TGCTCGGTTGCACTCCG                                                                | For amplification of Southern probe for confirmation of JW9021 and Northern blot probe of <i>apsA</i> , forward    |
| DVU0848-Pkan-F     | CCGGAATTGCCAGCTGGGGCGCCCTCTGGTAAGGTTGGGA<br>AGCCCTGCAA ATGTCGAACTCCATACTCGTCGTCG | For amplification of <i>qmoABC</i> DVU0851 with <i>aph(3')-IIp<sup>h</sup></i> for pMO9040 and pMO9042, forward    |
| TOPO8-EcoRV-up     | GCGAATTCGACCCAGCTTTCTTGT                                                         | For colony PCR screen and sequencing of complementing plasmids pMO9040 and pMO9042, forward                        |
| TOPO8-EcoRV-dw     | ATTTCTGTCCTGGCTGGTCTAGAGG                                                        | For colony PCR screen and sequencing of complementing plasmids pMO9040 and pMO9042, reverse                        |
| DVU0848-252F       | GGAGAAGGGCAATTACACCGTCTC                                                         | For colony PCR screen of pMO9040 and pMO9042 and sequencing of complementing plasmids pMO9116 and pMO9117, forward |
| DVU0849-208R       | TACCGCAGAGCAGGACACC                                                              | For colony PCR screen of pMO9040 and pMO9042 and sequencing of complementing plasmids pMO9116 and pMO9117, reverse |
| DVU0848-F          | AATCTCGGTGCTGGCAAGATCG                                                           | For sequencing of complementing plasmids pMO9116 and pMO9117, forward                                              |
| DVU0848-1F         | ATGTCGAACTCCATACTCGTCGTCG                                                        | For sequencing of complementing plasmids pMO9116 and pMO9117 and amplification of <i>qmoA</i> from cDNA, forward   |
| DVU0846-51-1F      | ATGGCCAGCAGAATTGGCGT                                                             | For sequencing of complementing plasmids pMO9116 and pMO9117, forward                                              |
| DVU0846-51-1R      | ACGCCAATTCTGCTGGCCAT                                                             | For sequencing of complementing plasmids pMO9116 and pMO9117, reverse                                              |
| DVU0846-51-R       | CTAGAAGCCGAAGCCGTCGTC                                                            | For sequencing of complementing plasmids pMO9116, pMO9117, and pMO9118, reverse                                    |
| DVU0849-740F       | ATGAAGAGATCGCCGTTGGTGC                                                           | For sequencing of complementing plasmids pMO9116 and pMO9117, forward                                              |
| DVU0849-1371F      | CATCATGAACTTCGAATACCGTCAGGG                                                      | For sequencing of complementing plasmids pMO9116 and pMO9117, forward                                              |
| DVU0849-2001F      | ATGGGTTGCCGACGCCATGTC                                                            | For sequencing of complementing plasmids pMO9116 and pMO9117, forward                                              |
| DVU0849-2021R      | GACATGGCGTCGGCAACCCAT                                                            | For sequencing of complementing plasmids pMO9116 and pMO9117, reverse                                              |
| DVU0849-1397R      | CCCTGACGGTATTCGAAGTTCATGATG                                                      | For sequencing of complementing plasmids pMO9116 and pMO9117, reverse                                              |
| DVU0849-761R       | GCACCAACGGCGATCTTTCAT                                                            | For sequencing of complementing plasmids pMO9116 and pMO9117, reverse                                              |
| DVU0850-570R       | AGGCTTGAACGACGCAAGCAG                                                            | For sequencing of complementing plasmids pMO9116 and pMO9117, reverse                                              |
| DVU0850-354R       | GGATACCGAAGAGGATGGGCAGG                                                          | For sequencing of complementing plasmids pMO9116 and pMO9117, reverse                                              |
| DVU0851-1F         | ATGTCTGACGAAGGTCGTAGAATGTTCAA                                                    | For sequencing of complementing plasmids pMO9117 and pMO9118, forward                                              |
| Kan-Tx-F           | CCGGAATTGCCAGCTGGG                                                               | For amplification of Kan <sup>r</sup> to obtain pMO9071, forward                                                   |
| Kan-Tx-R           | GCATGCGTTTAACTACGTAAGGAGTACTGCGCAGATCGG<br>CATCAGAAGAACTCGTCAAGAAGGCGAT          | For introduction of multicloning site and amplification of Kan <sup>r</sup> to obtain pMO9071, reverse             |
| DVU0851-1F-EcoRV   | GATATC ATGTCTGACGAAGGTCGTAGAATGTTCAA                                             | For amplification of DVU0851 with EcoRI cloning site to construct pMO9074, forward                                 |
| DVU0851-R-SphI     | GCATGC CTAGAAGCCGAAGCCGTCGTC                                                     | For amplification of DVU0851 with SphI cloning site to construct pMO9074, reverse                                  |

|            |                          |                                                          |
|------------|--------------------------|----------------------------------------------------------|
| pBG1-2199F | GCTGAAAGCGAGAAGAGCGCAC   | For sequencing of complementing plasmid pMO9118, reverse |
| DVU0847-R2 | TTCGGGGATGATCTGGTAGTAGGC | For amplification of <i>apsA</i> from cDNA, reverse      |
| DVU0848-R  | CGATCTTGCCAGCACCGAGATT   | For amplification of <i>qmoA</i> from cDNA, reverse      |

a – common sequence-1, common sequence in marker exchange deletions constructed in the Wall lab.

a' – reverse complement of common sequence-1.

b – barcode-1, unique to JW9021.

c – common sequence -2, common sequence in marker exchange deletions constructed in the Wall lab.

c' – reverse complement of common sequence-2.

d' – reverse complement of barcode-2, unique to JW9021.

e – barcode-1, unique to JW9063.

f' – reverse complement barcode-2, unique to JW9063.

g – RBS, ribosomal binding site (TGCAGTCCCAGGAGGTACCAT)

h - *aph(3')-I<sub>p</sub>* – promoter for the *aph(3')-II* gene

Figure S1. Stable hairpin structures located in the intergenic region between *apsA* and *qmoA* (Figs. S1A and S1B) and between *qmoC* and DVU0851 (Fig. S1C) in *D. vulgaris*. Melting temperature and hairpin predictions were determined using the mFold application on the IDT website, <http://www.idtdna.com/analyzer/Applications/OligoAnalyzer/>.

A) Possible hairpin structure for bases 11 through 40 of the *apsA-qmoA* intergenic region, melting temperature of 84.2 °C.

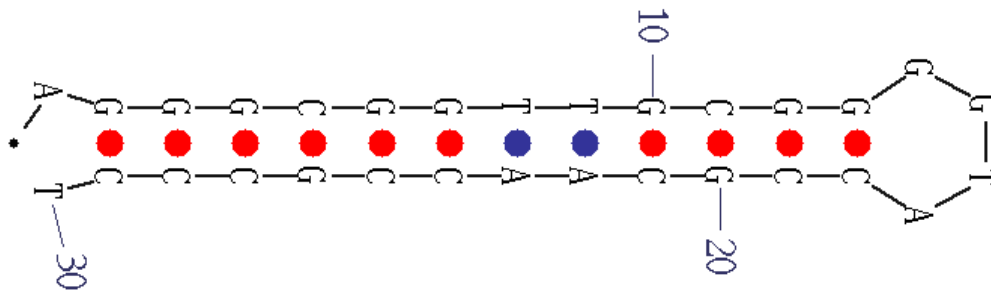

B) Possible hairpin structure for bases 57 through 107 of the *apsA-qmoA* intergenic region, melting temperature of 64.6 °C.

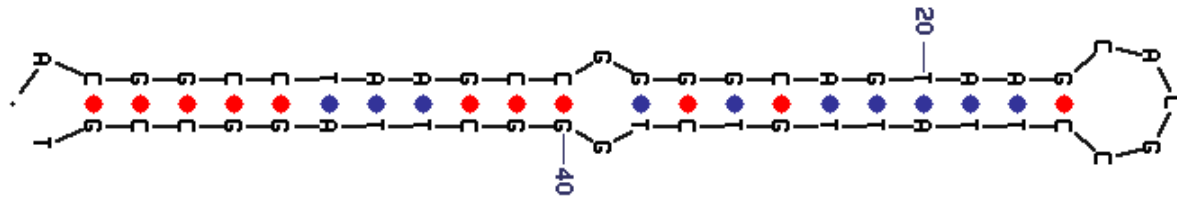

C) Possible hairpin structure for bases 11 through 34 of the *qmoC-DVU0851* intergenic region, melting temperature of 84.2 °C.

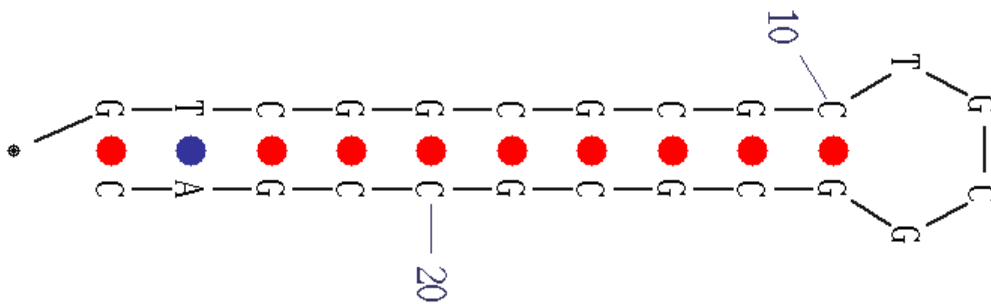

Supplement: supp_76_16_5500__1.pdf [file supp_76_16_5500__1.pdf]
